# Supplementary material for: TREM2 macrophage promotes cardiac repair in myocardial infarction by reprogramming metabolism via SLC25A53
Source: Springer Nature journal article supplement (doi:10.1038/s41418-023-01252-8), 2024-01-05

Figure1B

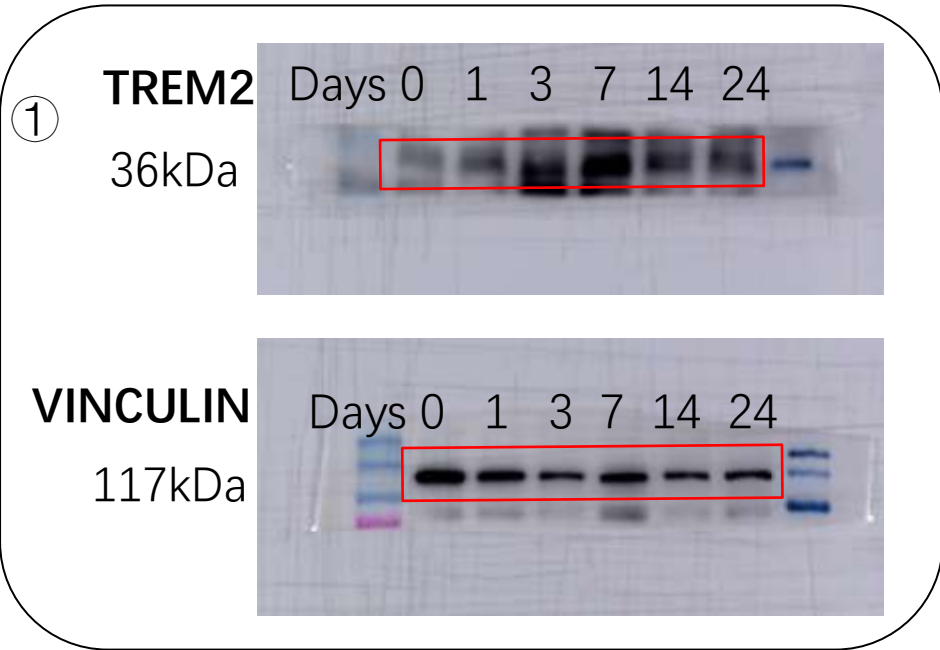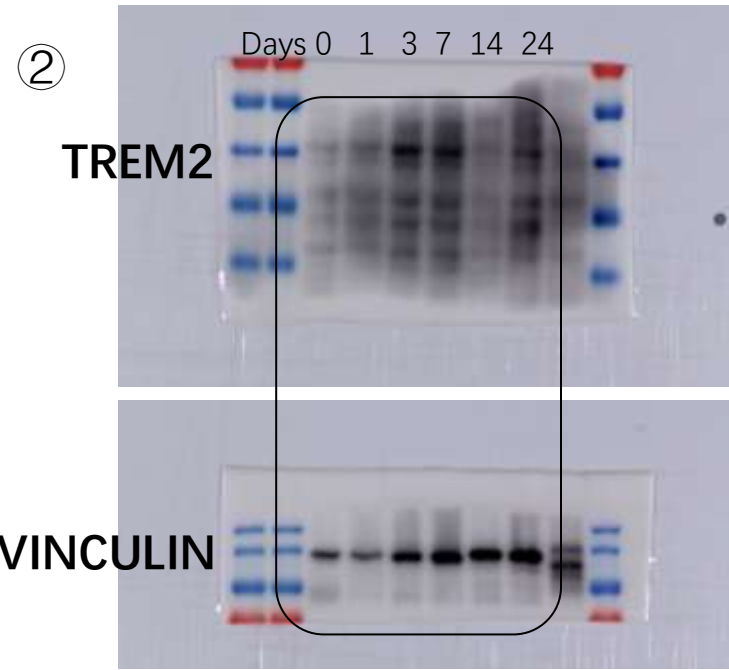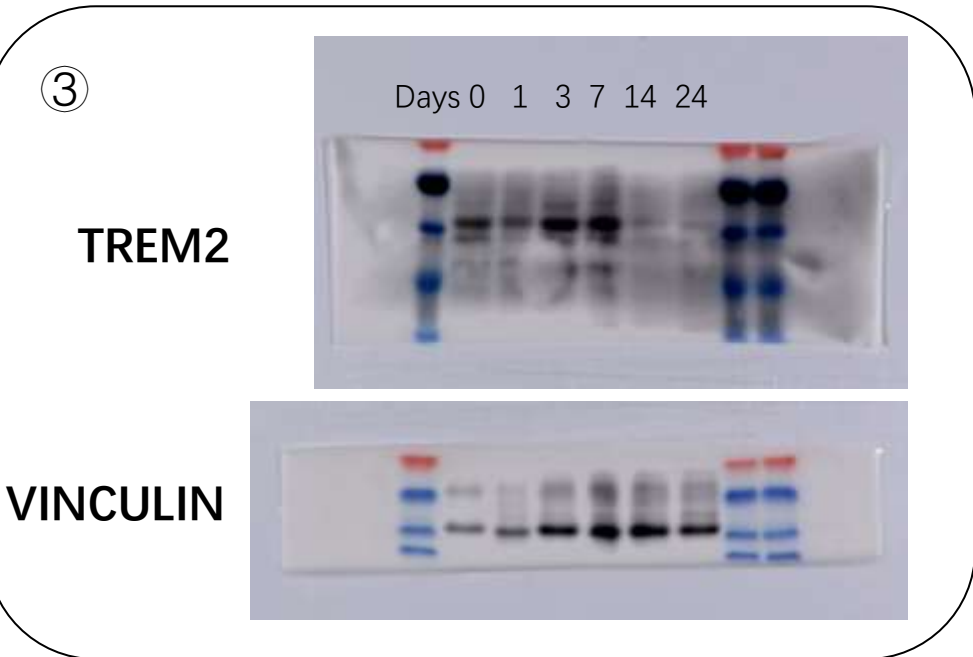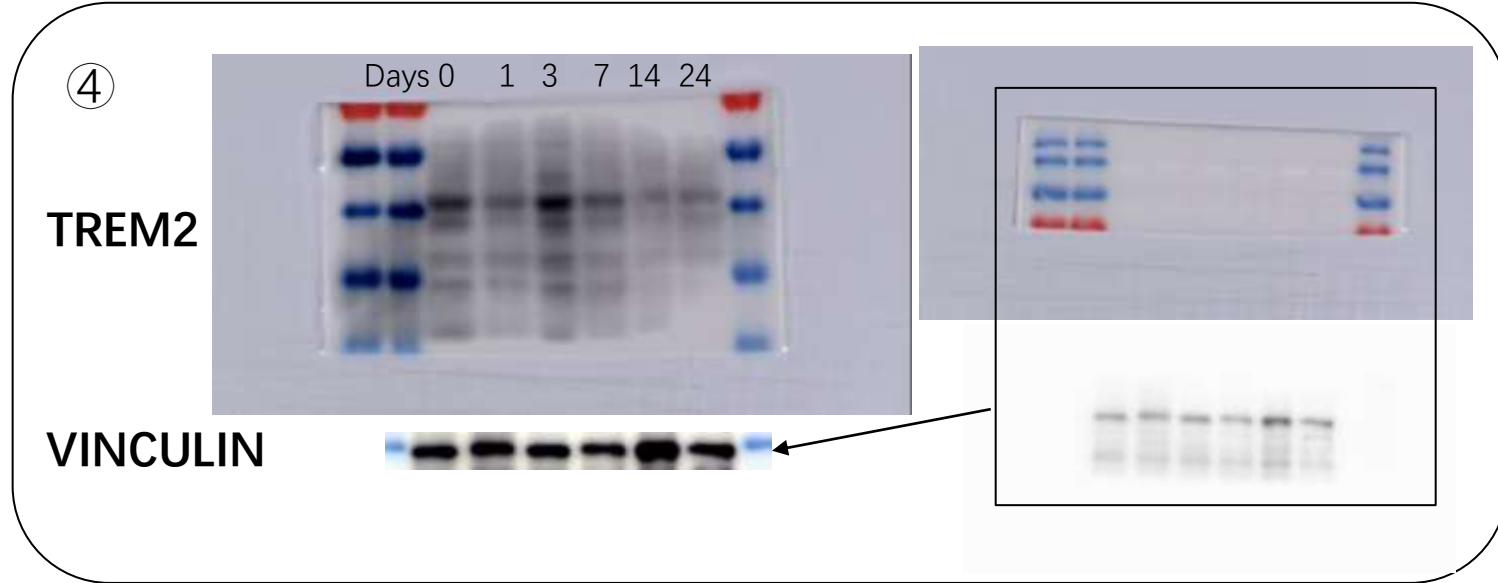

Figure1B

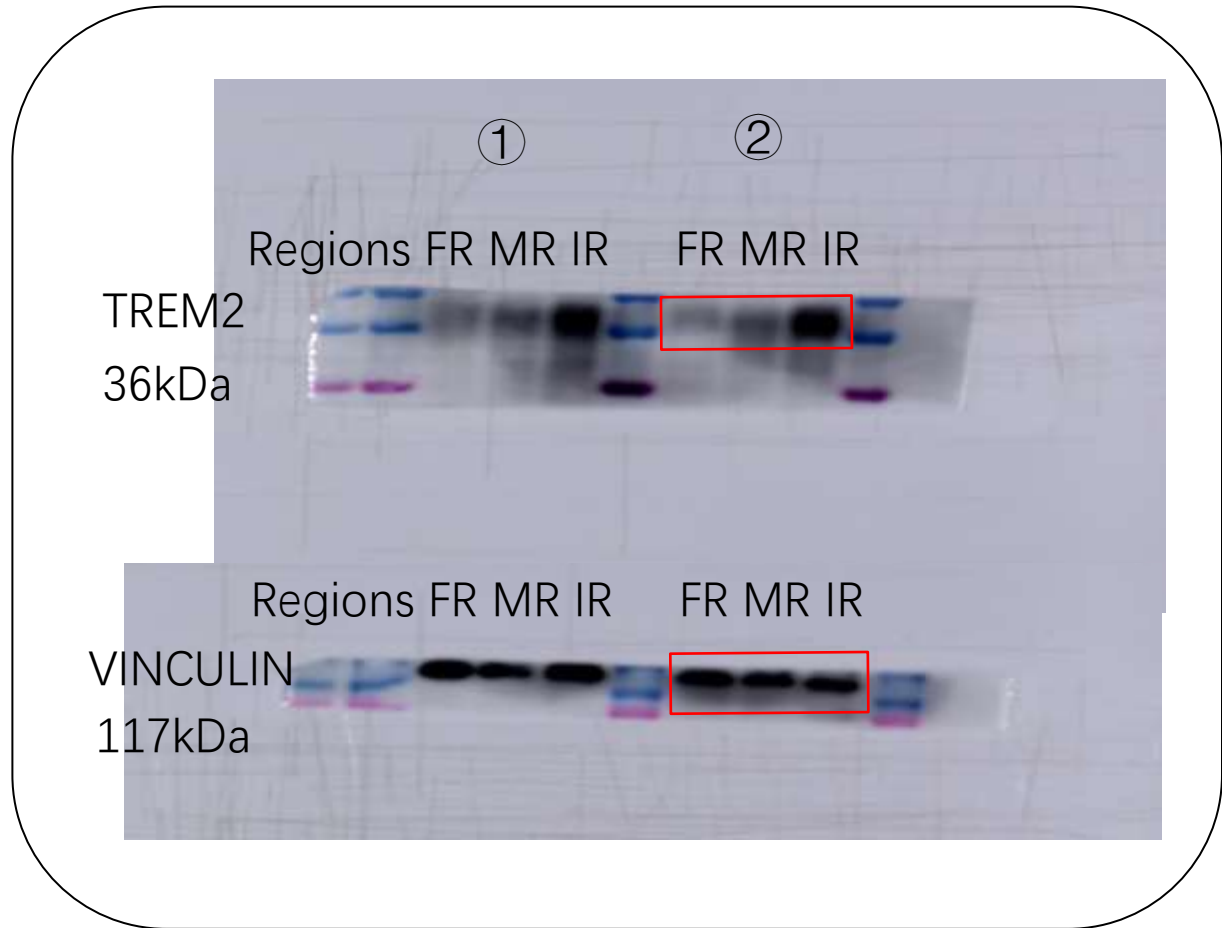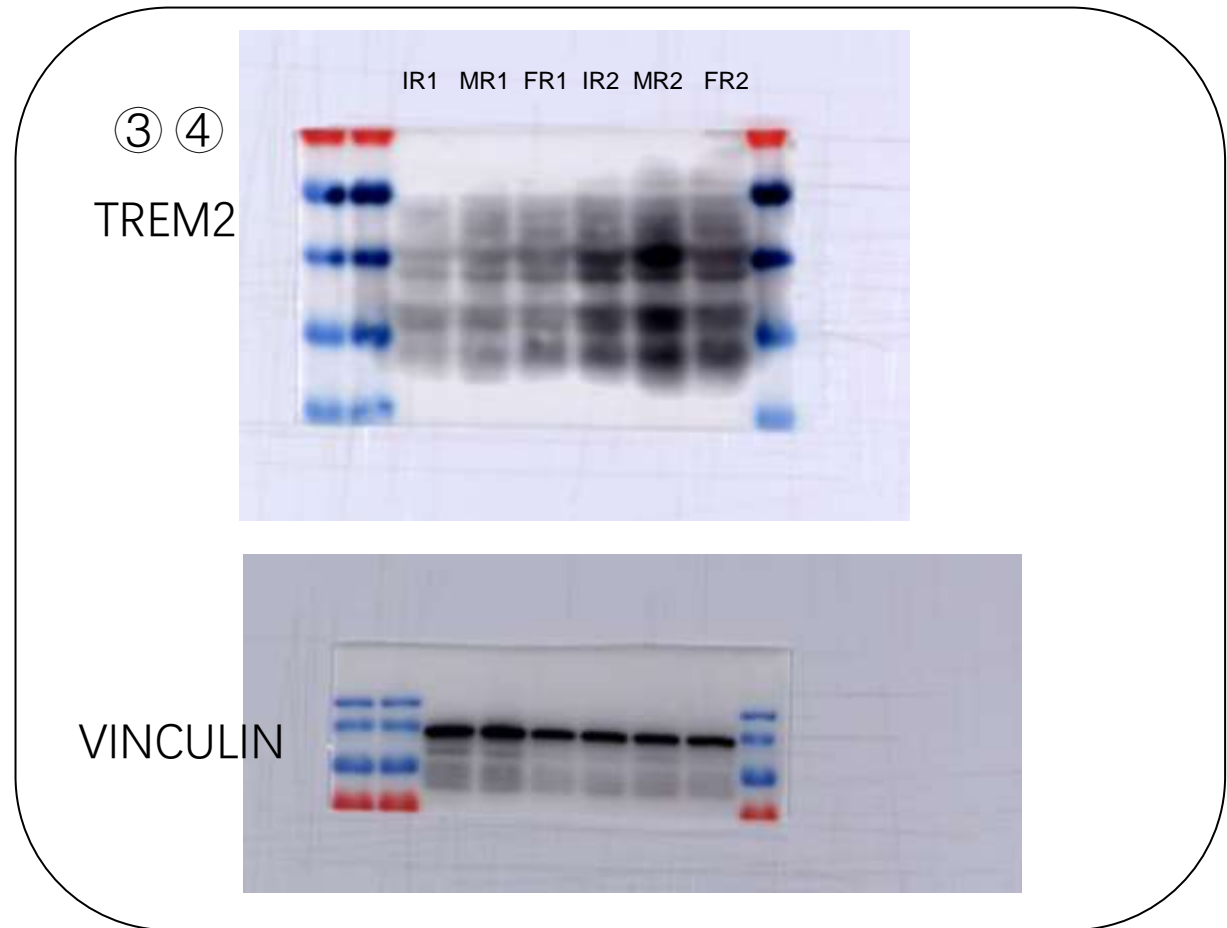

Figure4D ①

|               | Ctr |   |   | KO |   |   |
|---------------|-----|---|---|----|---|---|
| ACs           | -   | + | + | -  | + | + |
| CytochalasinD | -   | - | + | -  | - | + |

32kDa

SLC25A53

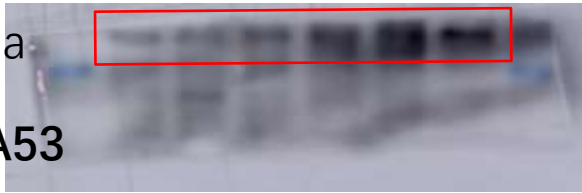

|               | Ctr |   |   | KO |   |   |
|---------------|-----|---|---|----|---|---|
| ACs           | -   | + | + | -  | + | + |
| CytochalasinD | -   | - | + | -  | - | + |

117kDa

VINCULIN

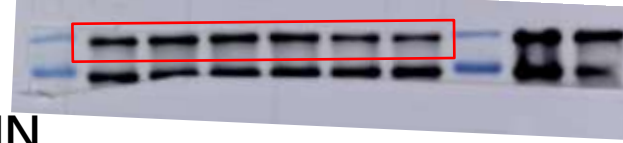

②

SLC25A53

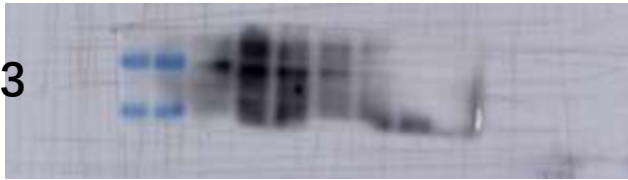

VINCULIN

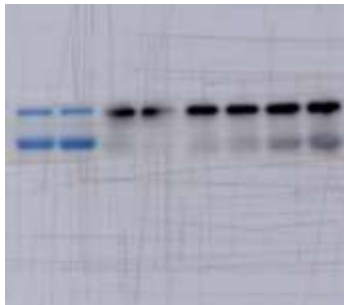

③

SLC25A53

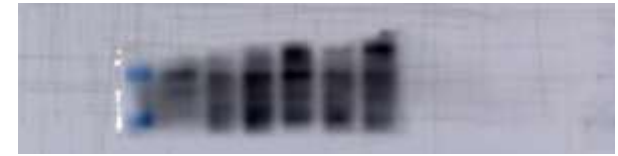

VINCULIN

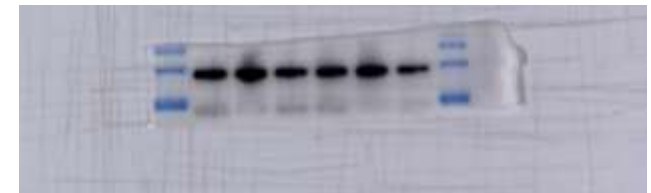

Figure4F ①

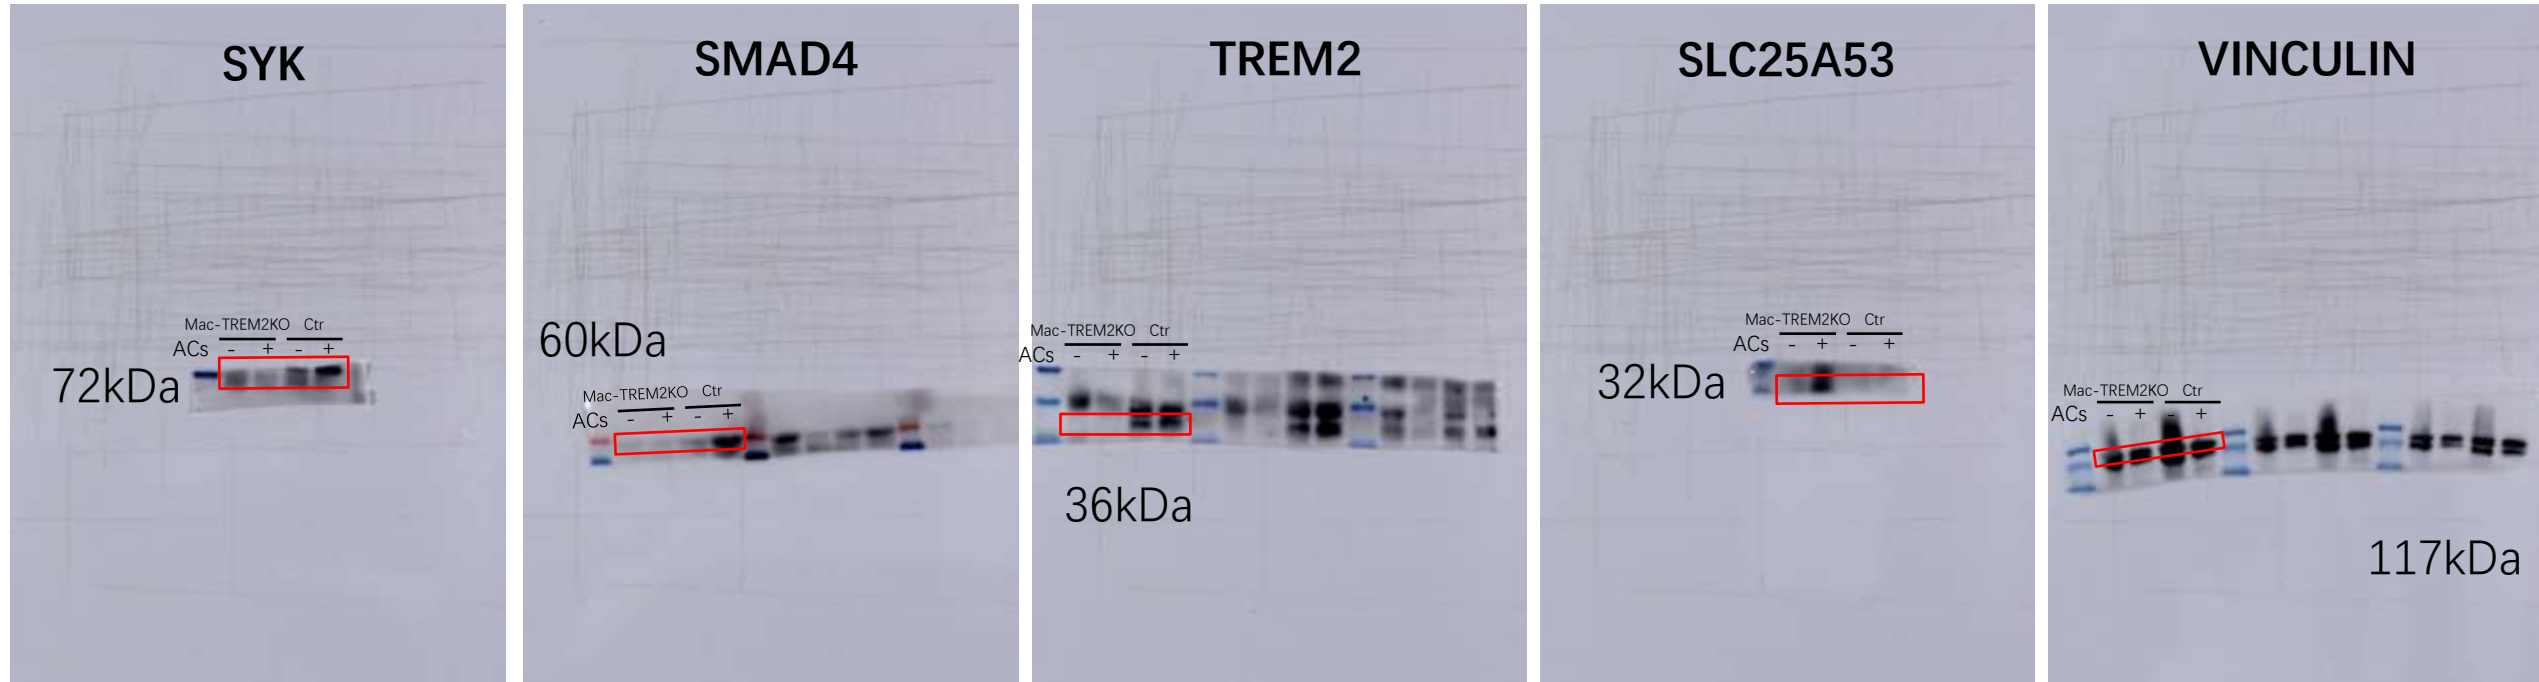

Figure4F

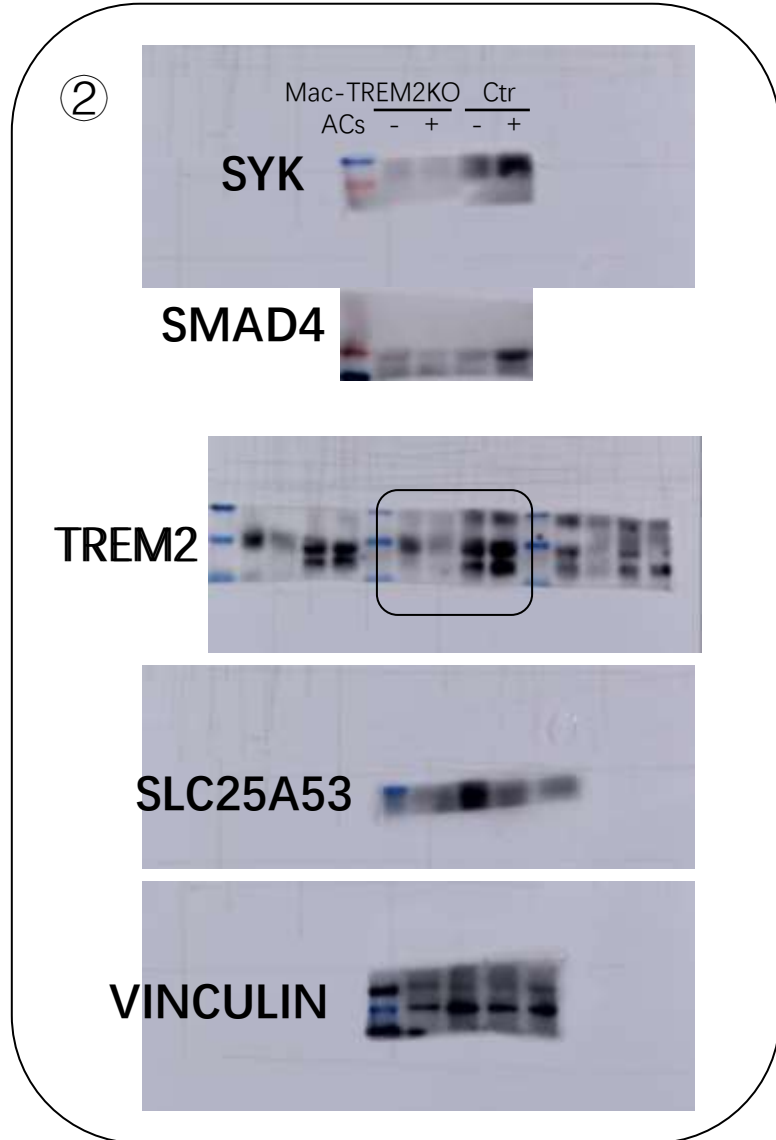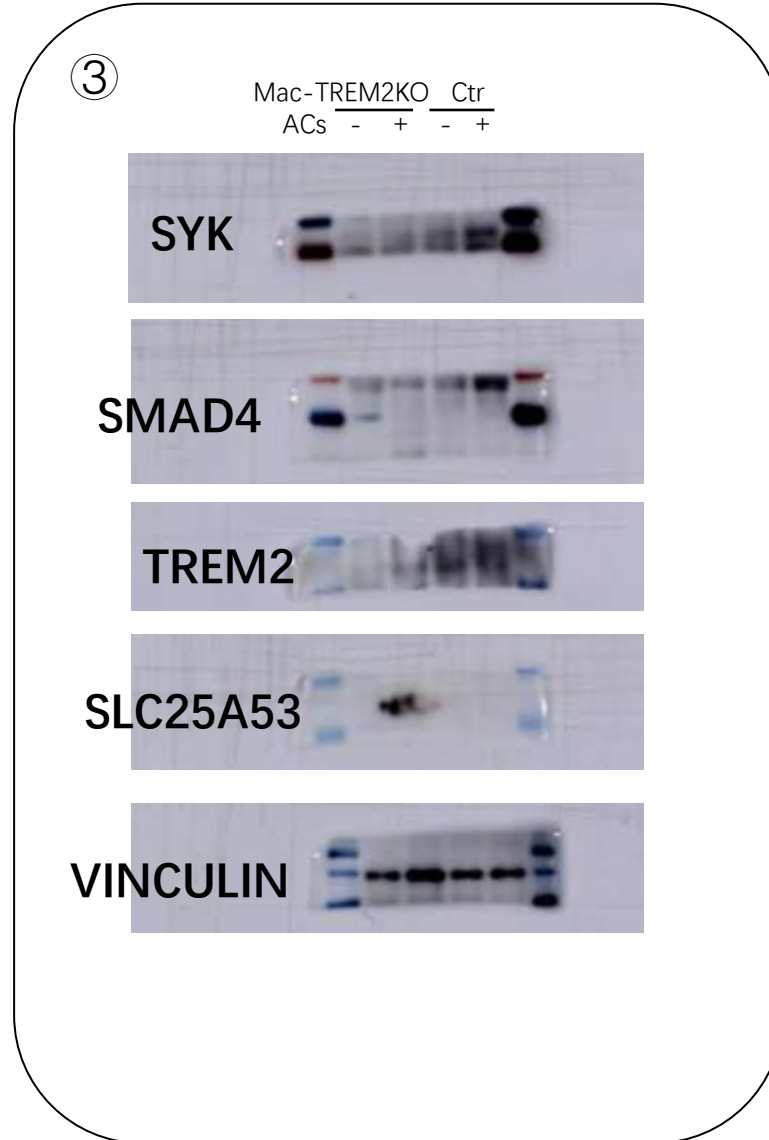

Figure4G

①

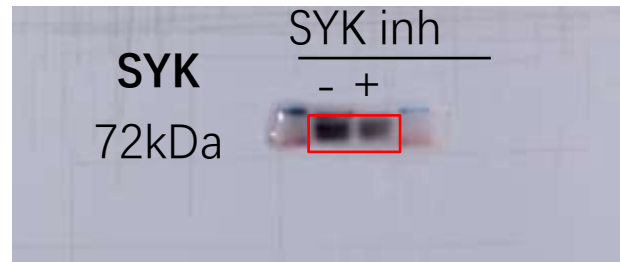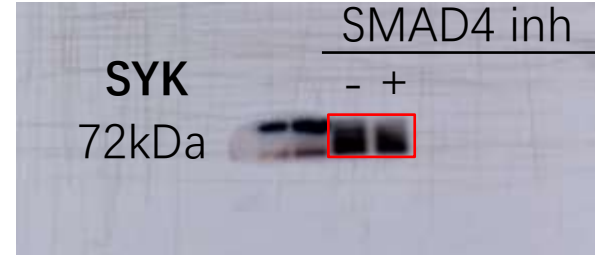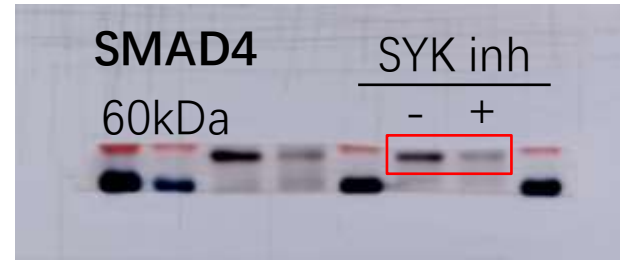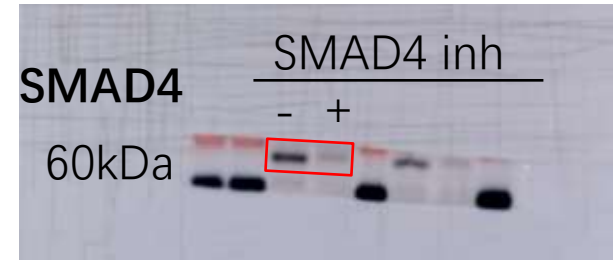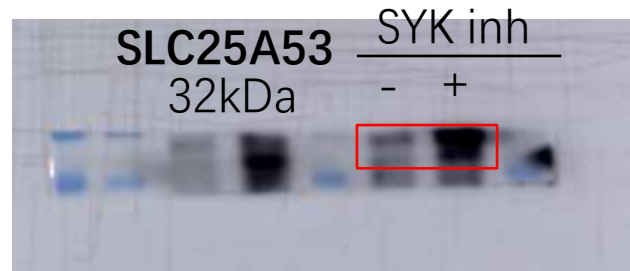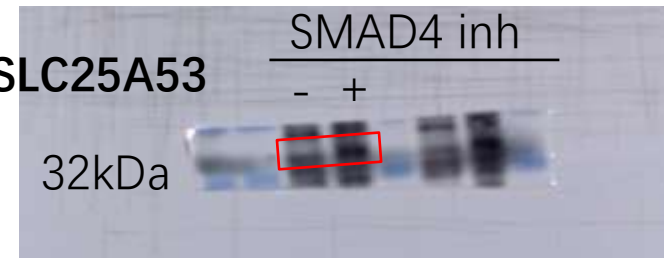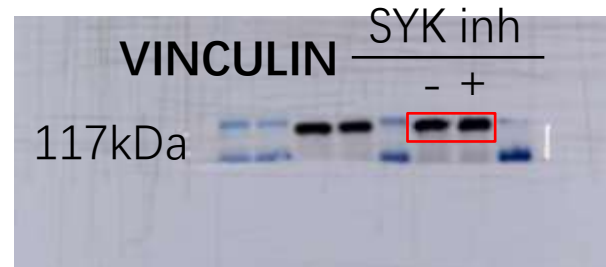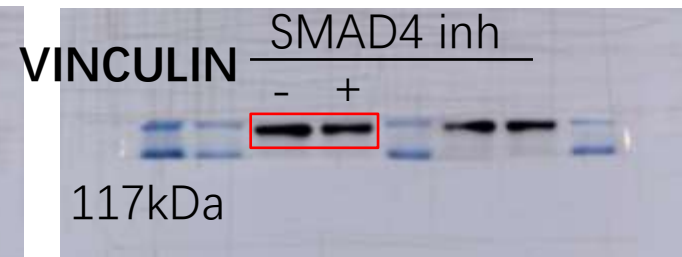

Figure4G

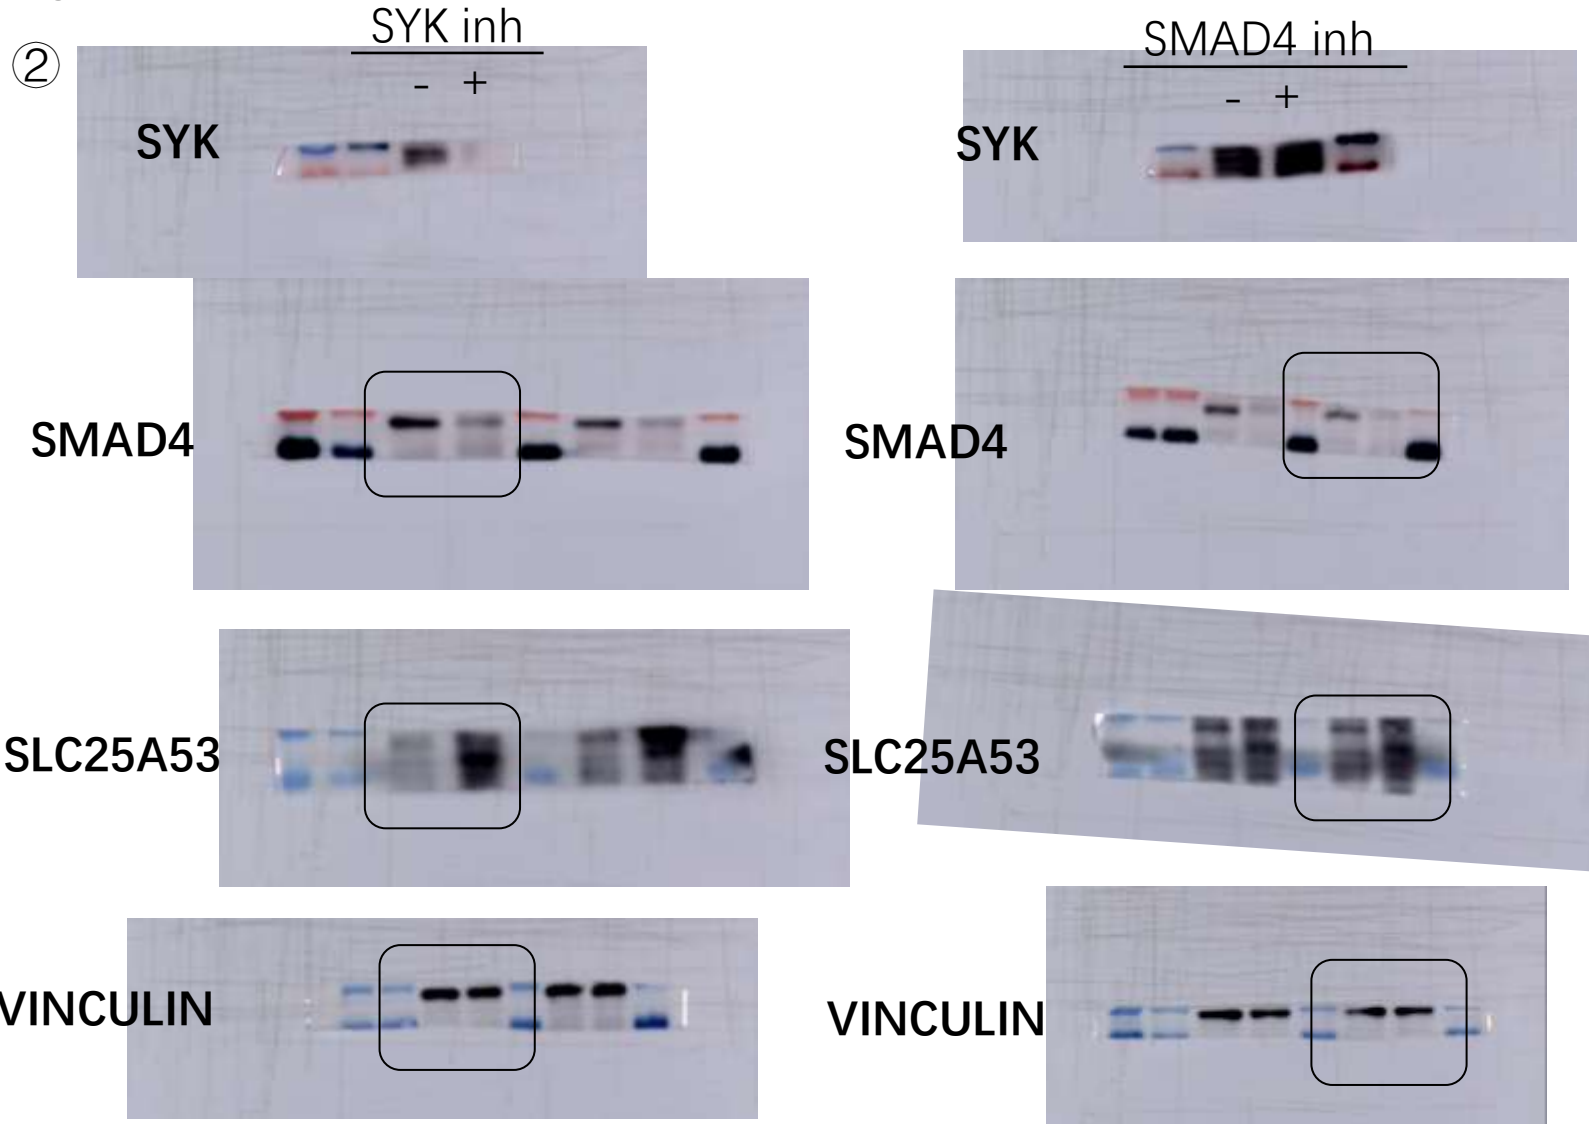

Figure4G

③

SYK

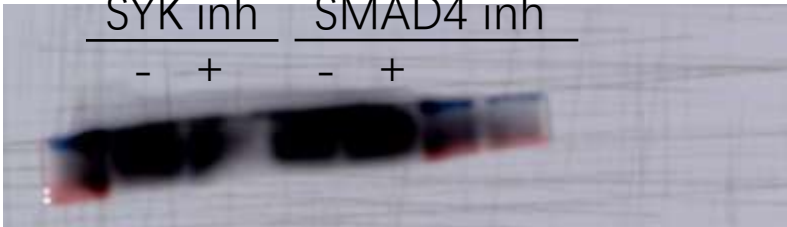

SMAD4

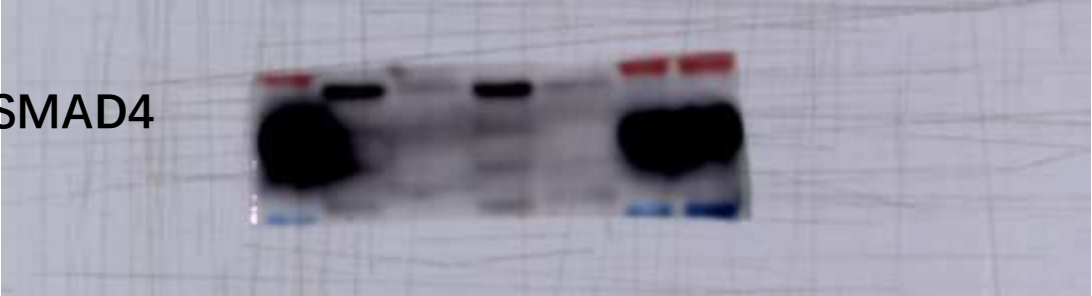

SLC25A53

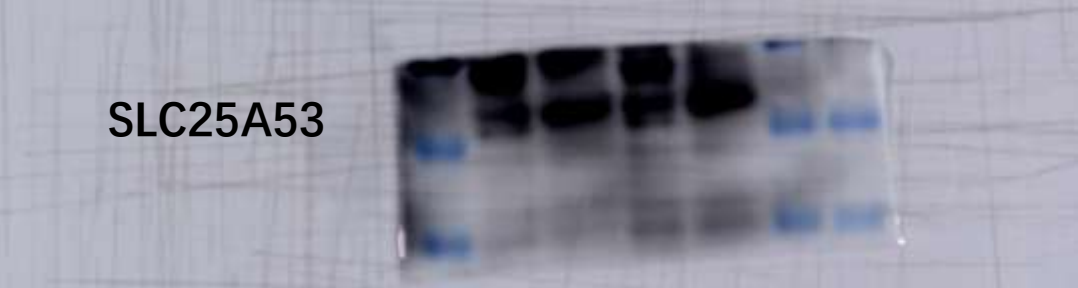

VINCULIN

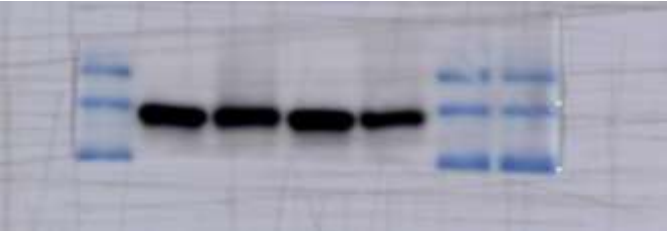

Figure6D

①-③

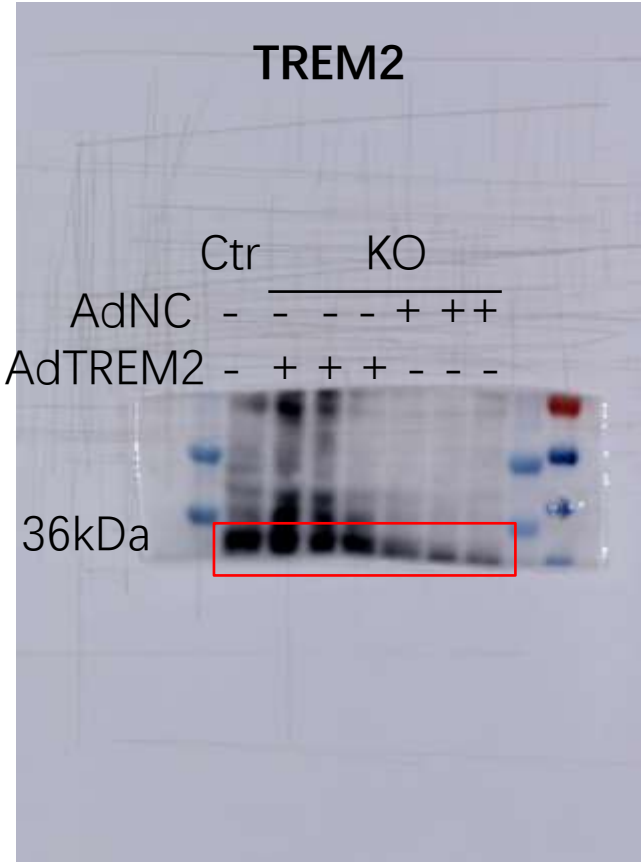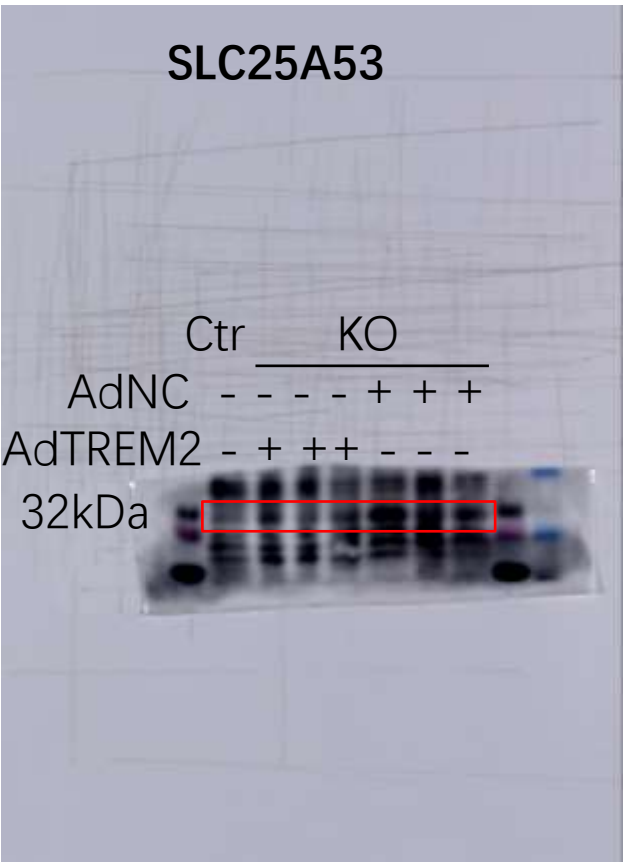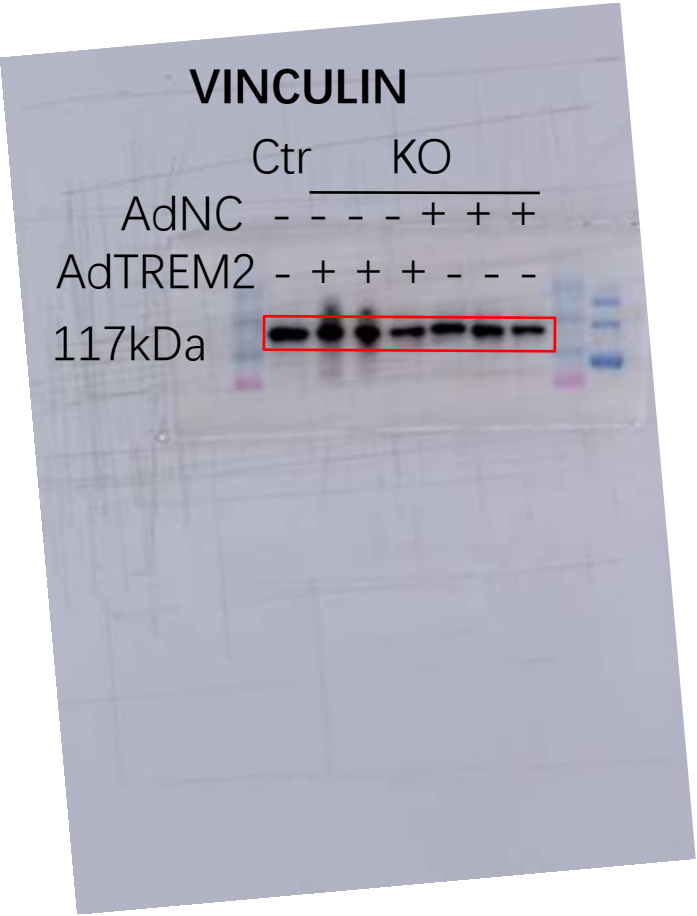

Supplementary Figure 1A ①-⑤

Heart lung BM spleen

Heart lung BM spleen

TREM2

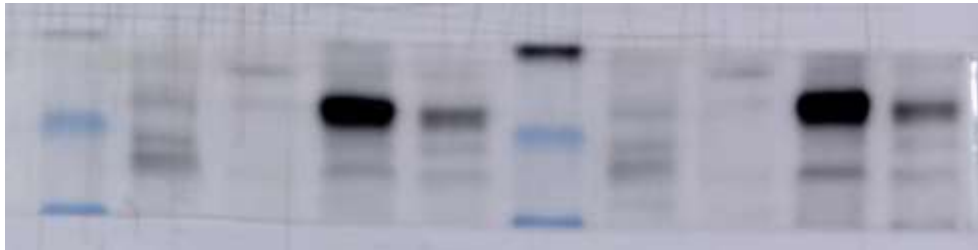

TREM2

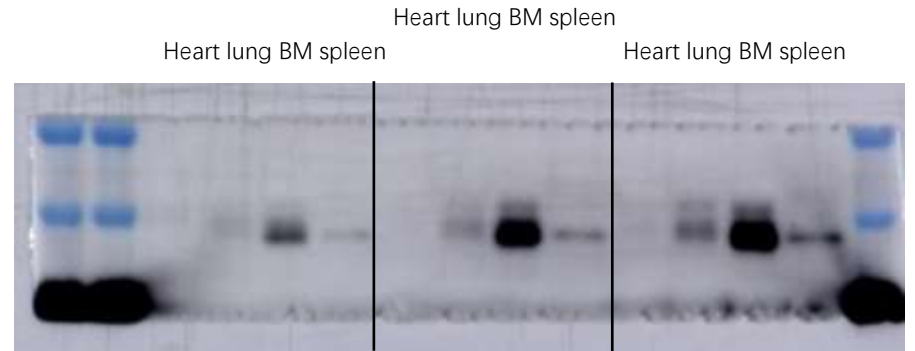

VINCULIN

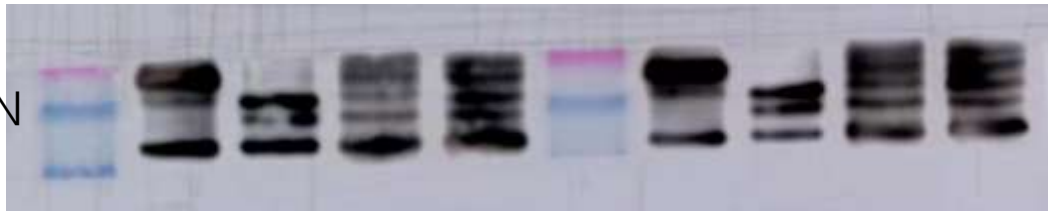

VINCULIN

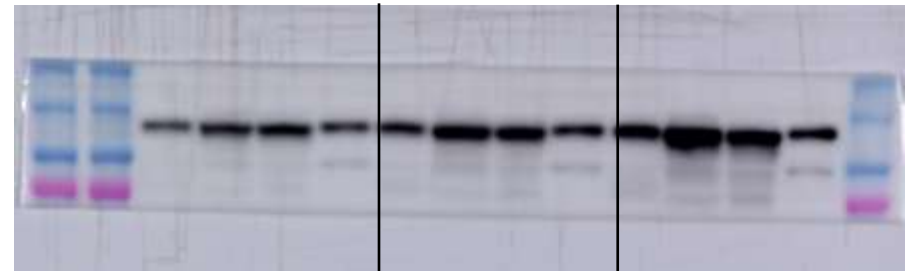

Supplementary Figure 1B ①-⑤

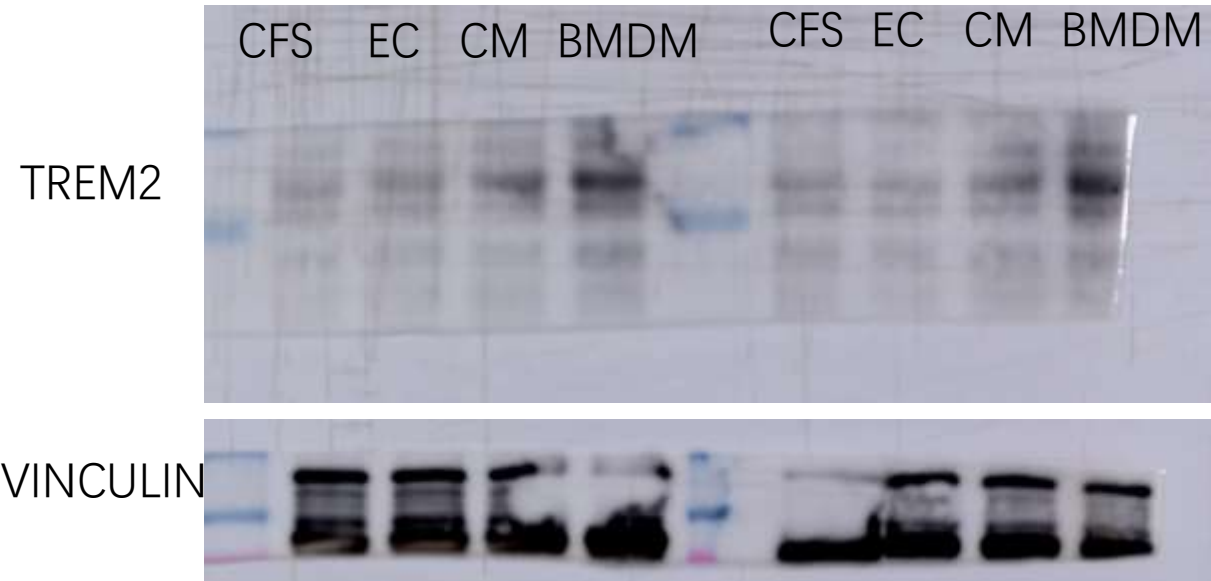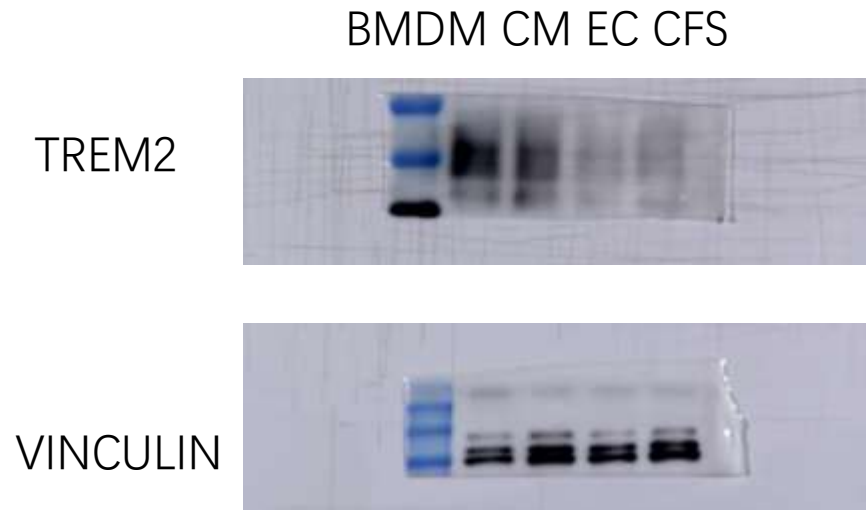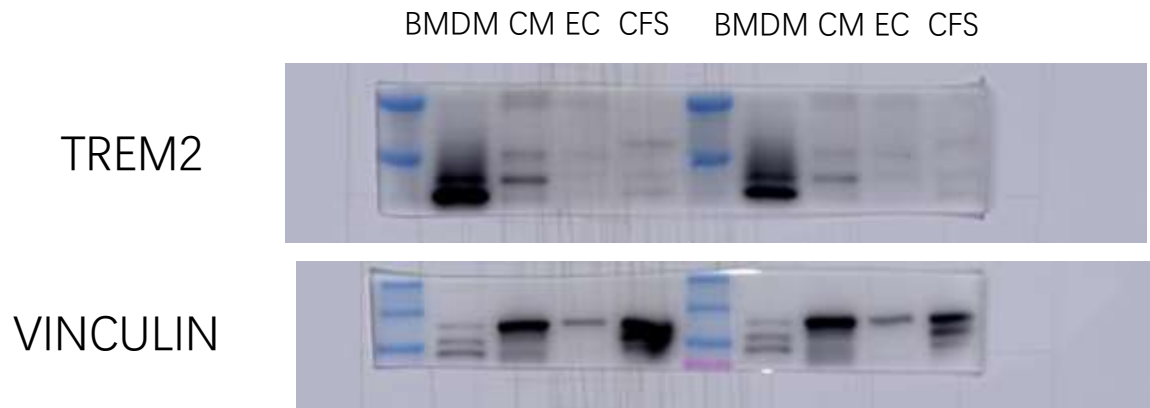

Supplementary Figure 3D ①-③

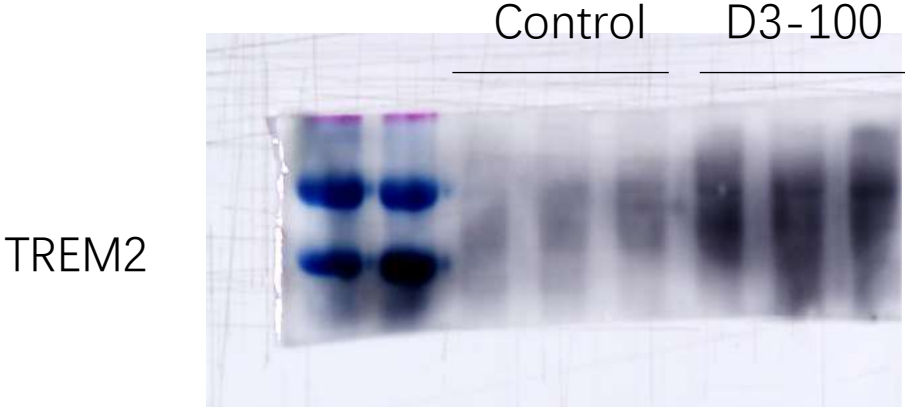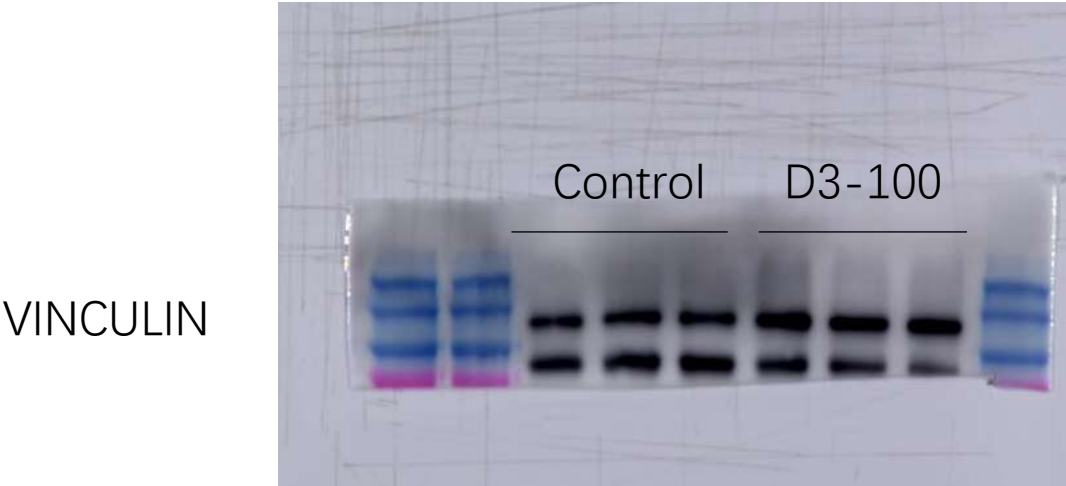

Supplementary Figure 6D ①-⑤

RAW

HEK293

TREM2

TREM2

VINCULIN

VINCULIN

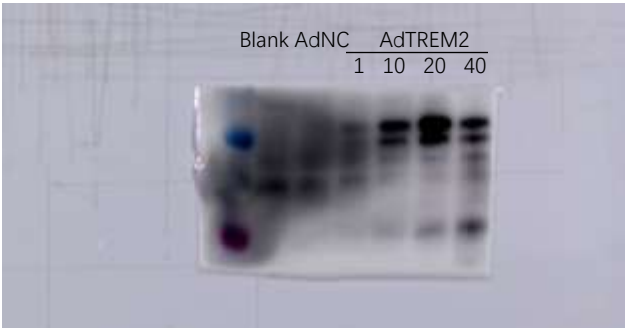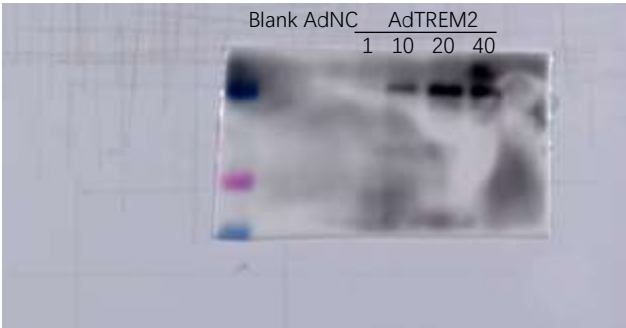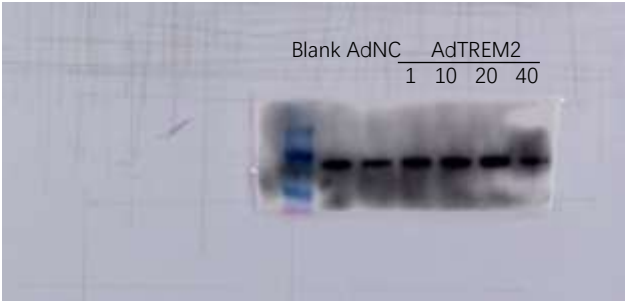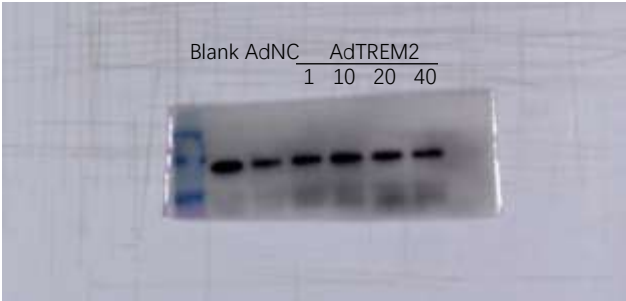

Supplementary Figure 8A ①-③

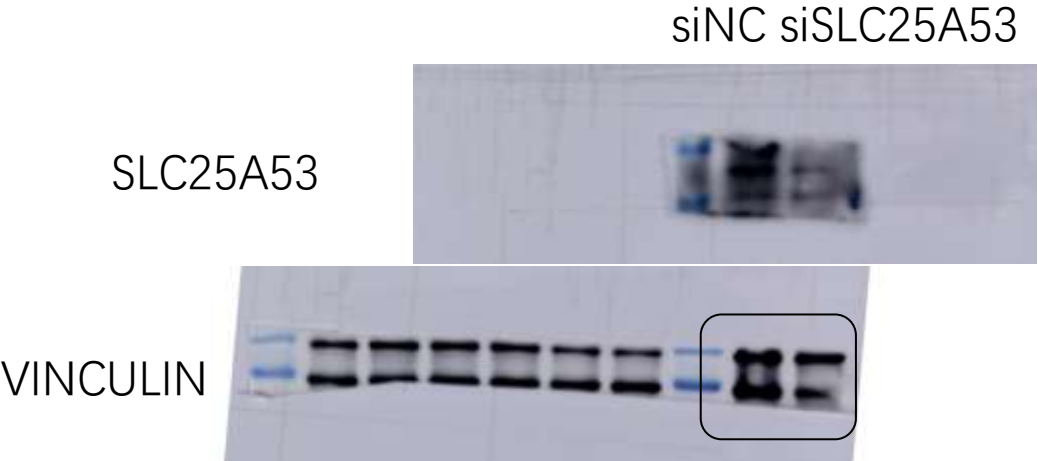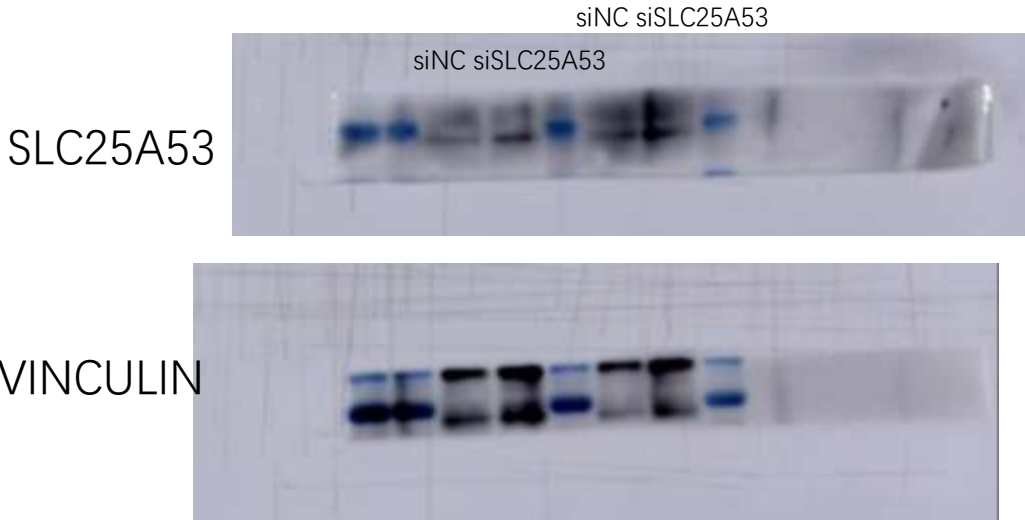

Supplementary Figure 9E ①-③

Cleaved-caspase3

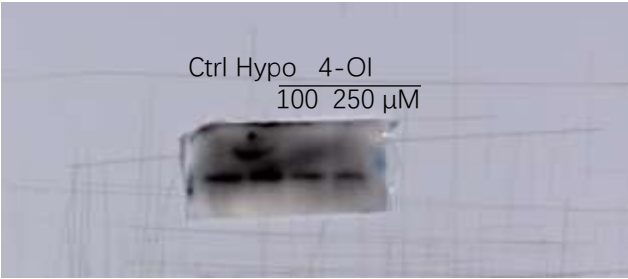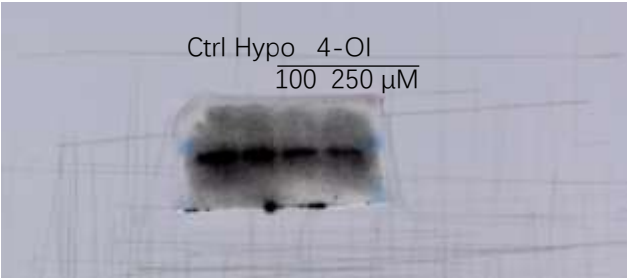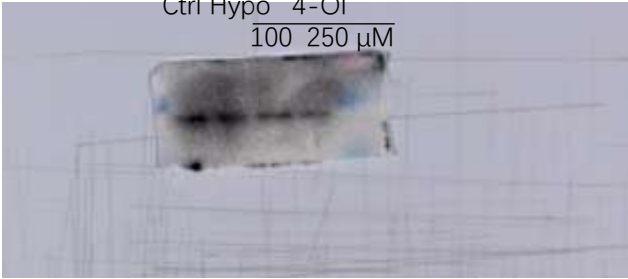

β-ACTIN

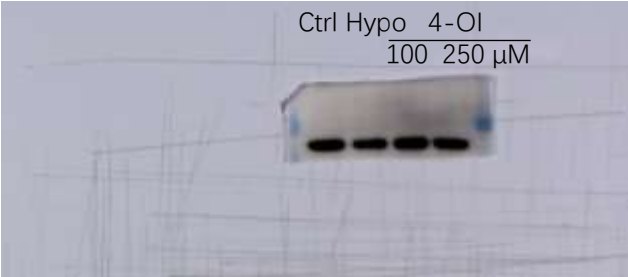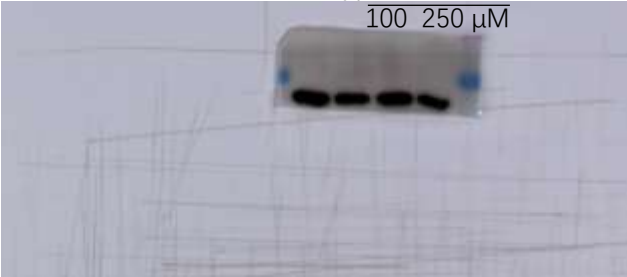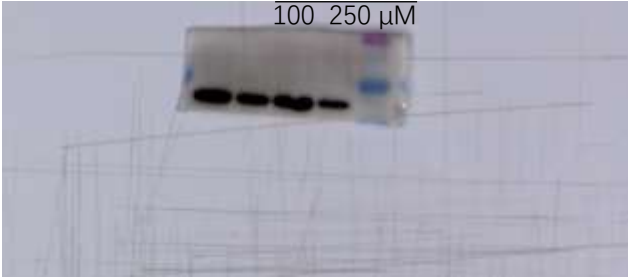

Supplementary Figure 11B ①-③

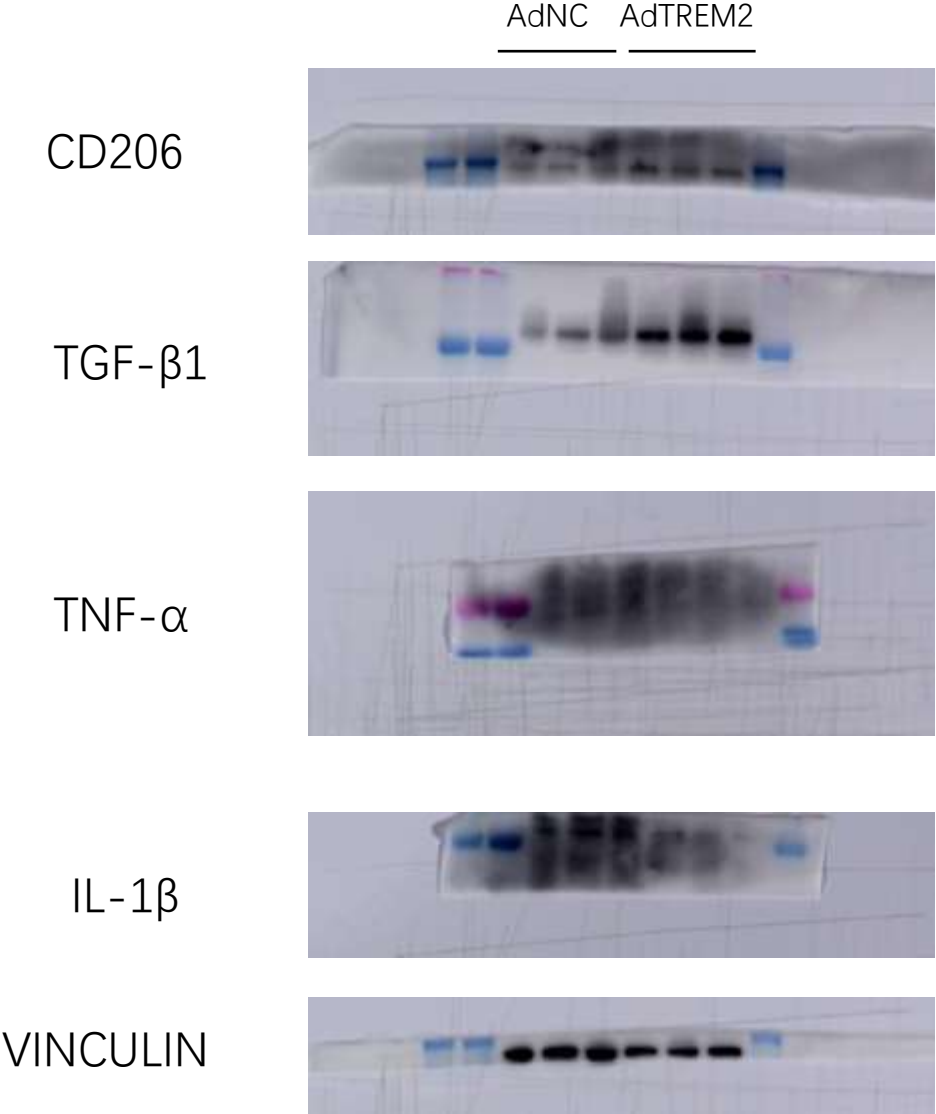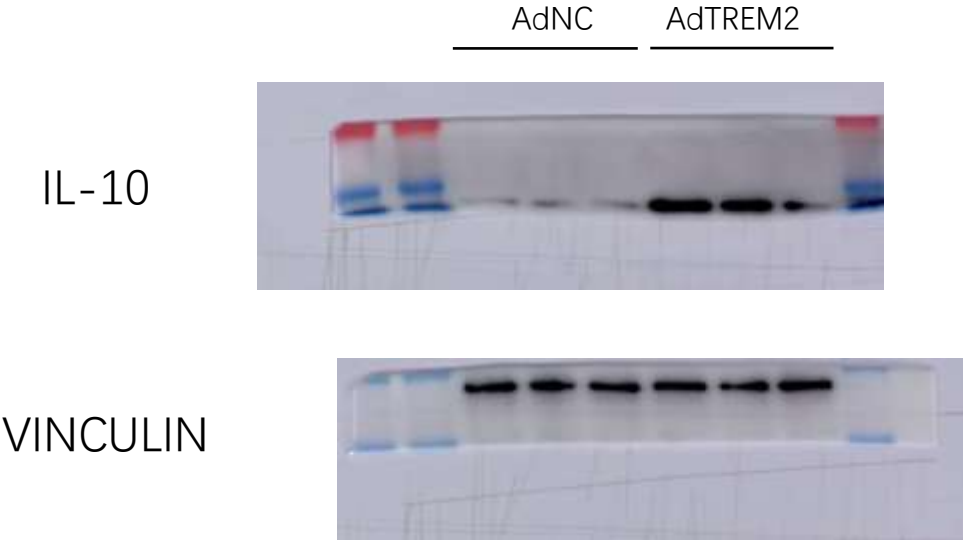

Supplement: MOESM2 [file 41418_2023_1252_MOESM2_ESM.pdf]
